# Supplementary material
Source: publisher site journal article supplement (https://www.dovepress.com/article/369963)
Supplement: Supplementary file 1 [file get_supplementary_file.php]

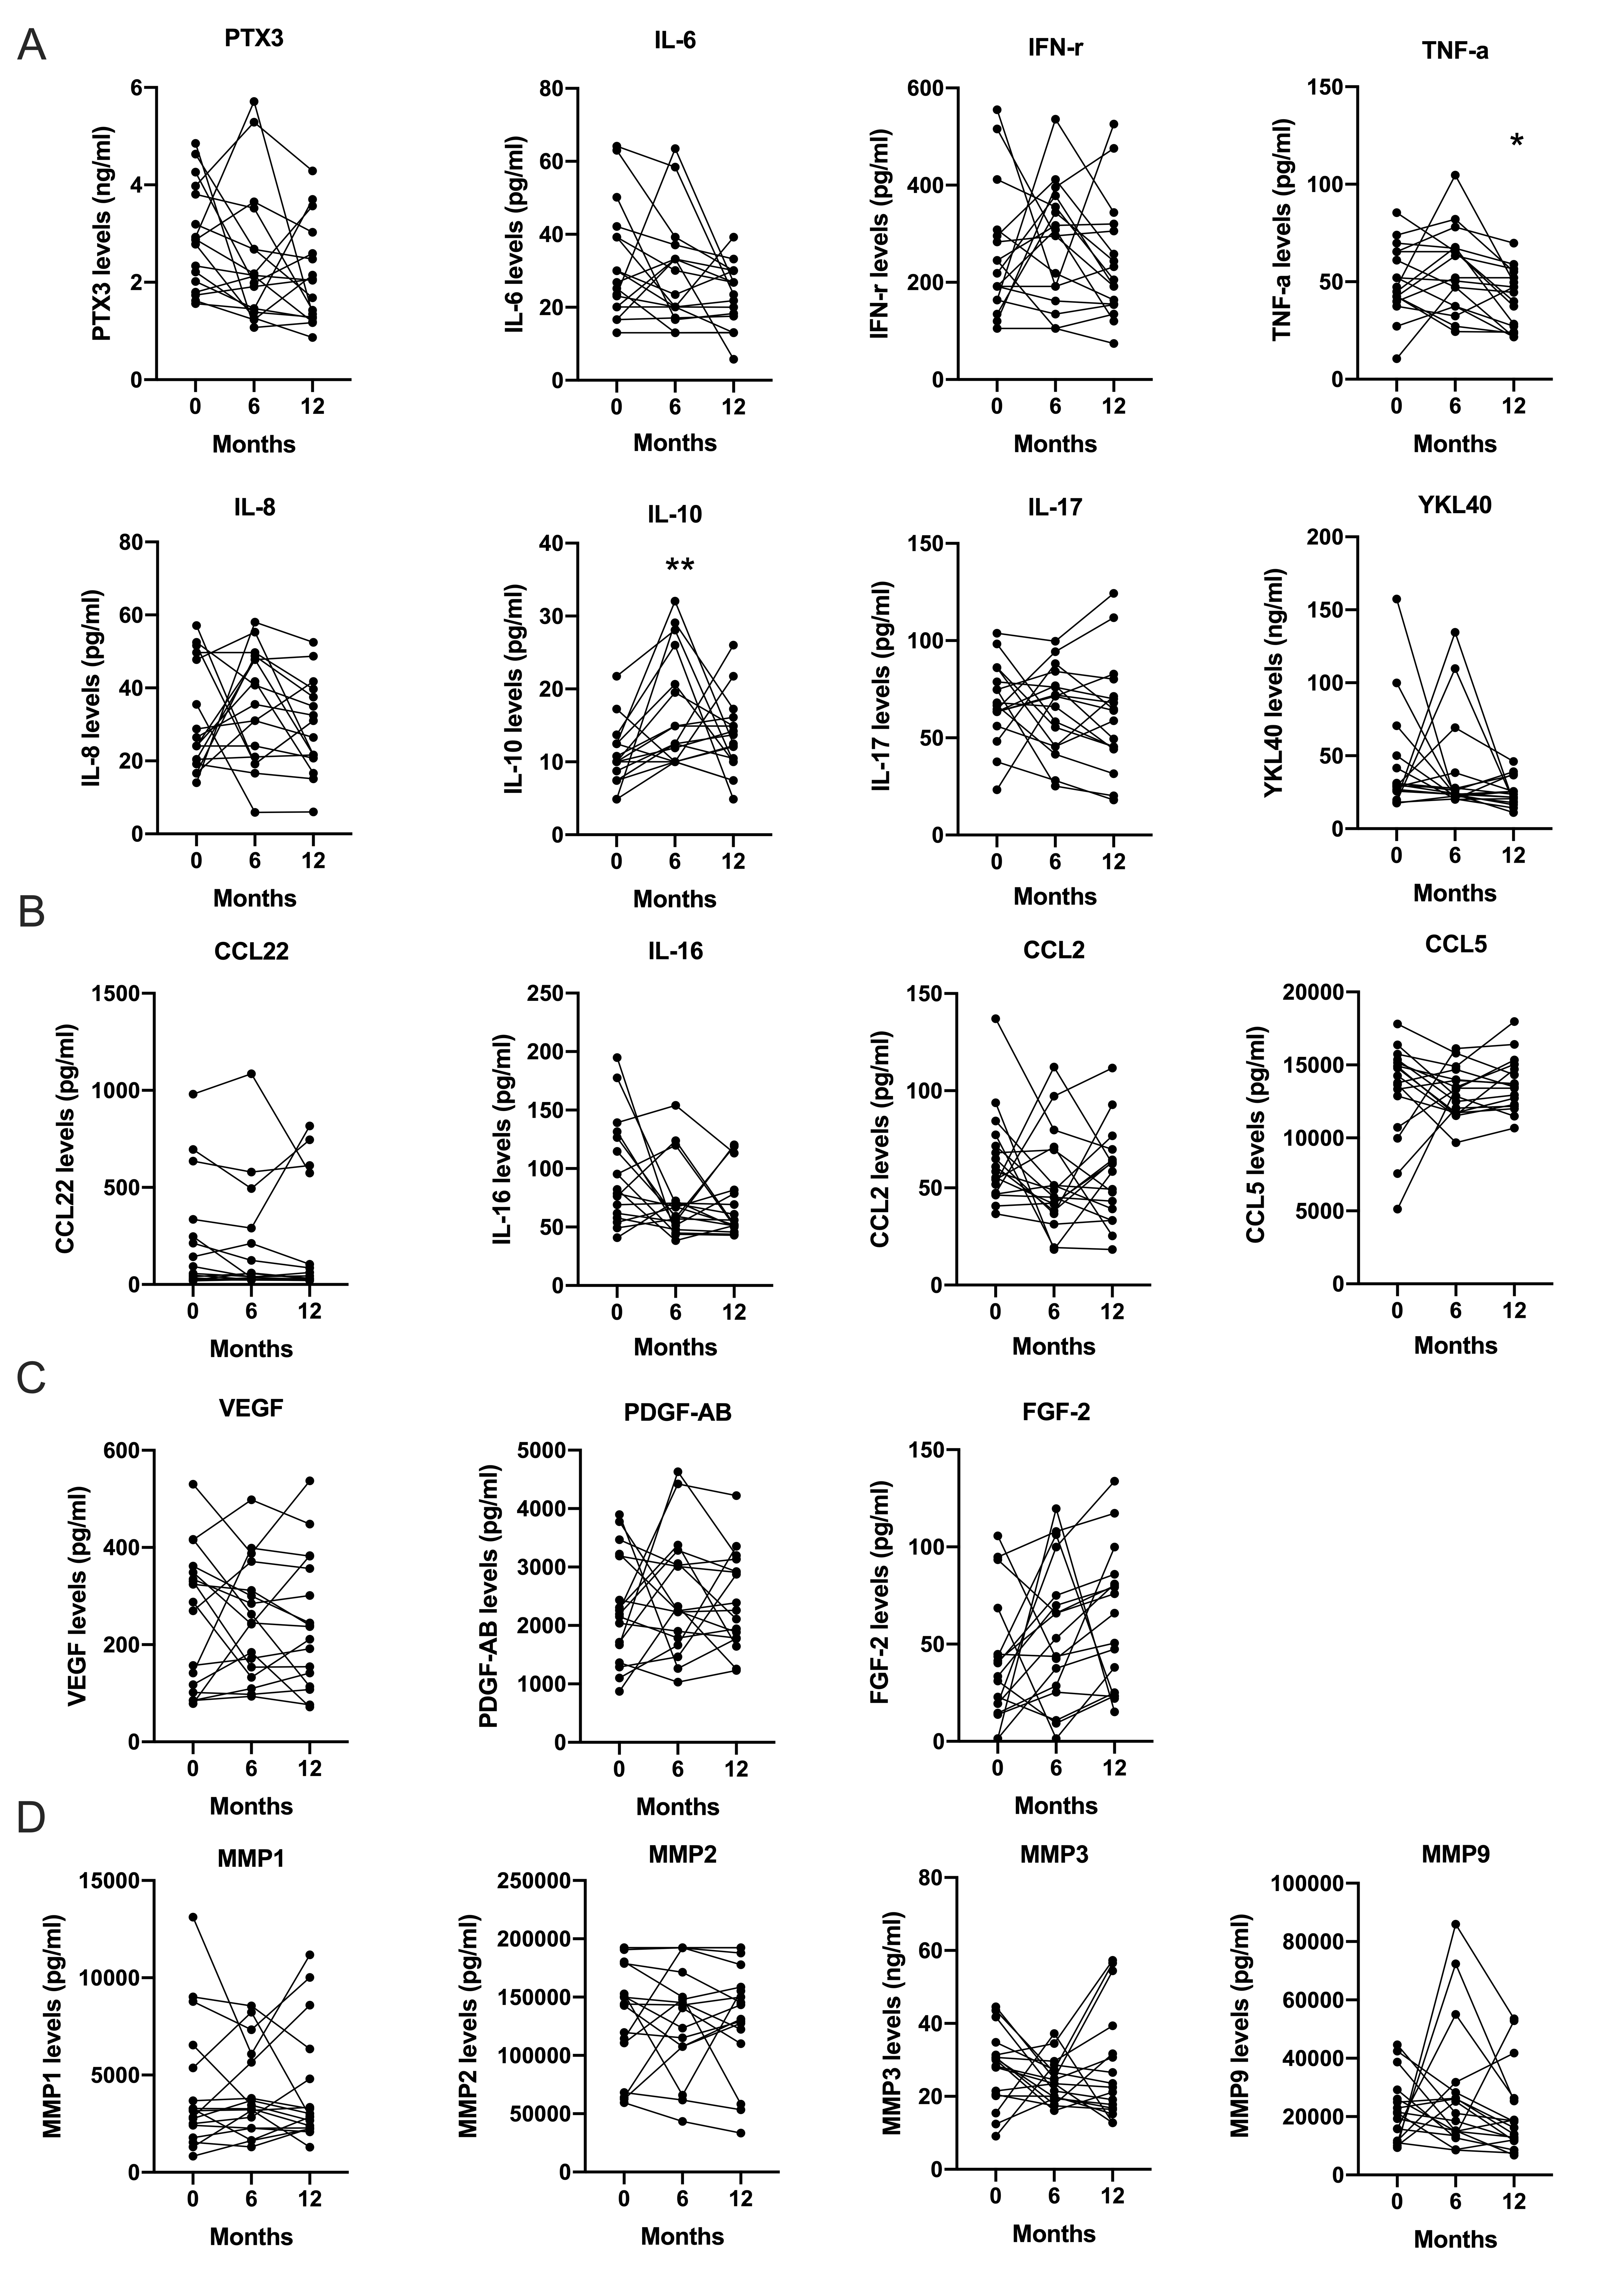


**Supplementary Figure S1. Changes in cytokines, chemokines, growth factors, and MMPs after treatment.** Changes in the levels of cytokines (A), chemokines (B), growth factors (C), and MMPs (D) in TAK patients at 6 and 12 months after treatment. * P < 0.05: 6 vs. 12 months (TNF-a), ** P ＜ 0.01, 0 vs. 6 months (IL-10).


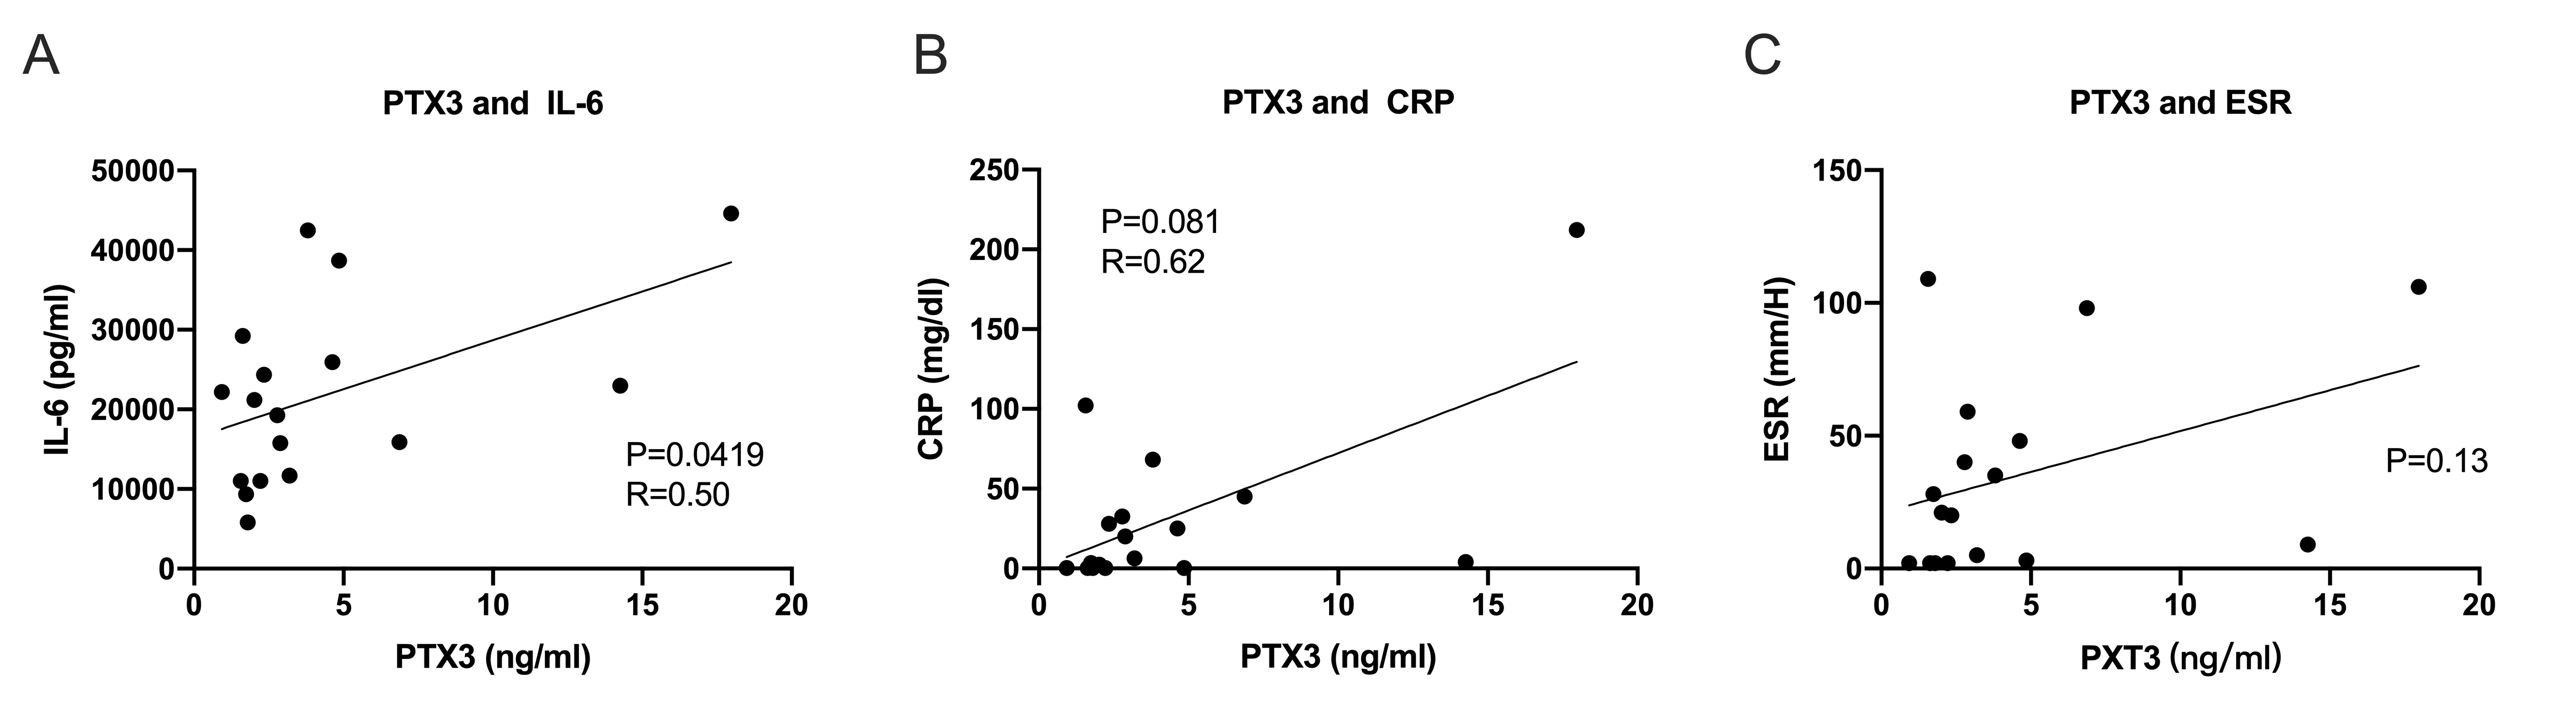


**Supplementary Figure S2. Correlation analysis.** A-C. Correlation analysis between PTX3 and (A) ESR, (B) CRP, (C) or IL-6.

**Supplementary Table S1. Comparison of characteristics between patients included in this study patients excluded from this treated with GCs and TOF**

| **Parameters** | **TAK patients with GCs and TOF treatment** | | |
| --- | --- | --- | --- |
| **Included patients (n=17)** | **Excluded patients (n=10)** | **P value** |
| **General information** |  |  |  |
| Females: males (n) | 14:3 | 9:1 | 0.61 |
| Age (mean ± SD, years) | 28.12±8.99 | 32.00±4.14 | 0.14 |
| Disease duration (median, IQR, months)  Disease activity, n (%) | 15.00 (12.00, 35.50)  17 (100) | 17.00 (4.00,77.50)  10 (100.00) | 0.52  0.68 |
| Naive patients: refractory patients | 6: 11 | 2:8 | 0.42 |
| **Imaging type, n (%)** |  |  |  |
| Ⅰ | 3 (17.65) | 3 (30.00) | 0.60 |
| Ⅱ | 3 (17.65) | 2 (20.00) |  |
| Ⅲ | 3 (17.65) | 0 |  |
| Ⅳ | 1 (5.88) | 22 (20.00) |  |
| Ⅴ | 7 (41.18) | 3 (30.00) |  |
| **Symptoms and signs, n (%)** |  |  |  |
| Systemic symptoms | 13 (76.47) | 6 (60.00) | 0.38 |
| Fever | 3 (17.65) | 3 (30.00) |  |
| Weakness | 11 (64.71) | 4 (40.00) |  |
| Weight loss | 1 (5.88) | 0 |  |
| Ischemia symptom or signs | 15 (88.24) | 10 (100.00) | 0.16 |
| Headache/dizziness | 9 (52.94) | 3 (30.00) |  |
| Chest pain/distress | 4 (23.53) | 4 (40.00) |  |
| Vascular murmur | 9 (52.94) | 8 (80.00) |  |
| Neck pain | 6 (35.29) | 2 (20.00) |  |
| **Laboratory results (median, IQR)** |  |  |  |
| ESR (mm/H) | 21.00 (2.50, 53.50) | 18.50 (3.50, 40.00) | 0.42 |
| CRP (mg/dl) | 6.30 (0.30, 38.80) | 5.65 (1.65,2 5.55) | 0.47 |
| **Previous treatment, n (%)** | 11 (64.71) | 8 (80.00) | 0.51 |
| GCs alone | 3 (17.65) | 2 (20.00) |  |
| GCs+MTX | 1 (5.88) | 2 (20.00) |  |
| GCs+LEF | 4 (23.53) | 2 (20.00) |  |
| GCs+MMF | 2 (11.76) | 1 (10.00) |  |
| GCs+TCZ | 1 (5.88) | 1 (10.00) |  |

GCs: glucocorticoids; TOF: tofacitinib

**Supplementary Table S2. Molecular signatures associated with vascular lesions or imaging changes in treatment-naive patients with TAK**

| **Baseline Biomarkers** | **Baseline vascular occlusion** | | | **Post-treatment vascular imaging improvement** | | |
| --- | --- | --- | --- | --- | --- | --- |
|  | **No (n=4)** | **Yes (n=2)** | **P value** | **No (n=5)** | **Yes (n=1)** | **P value** |
| CCL22 (pg/ml) | 300.28±456.63 | 22.67±0.43 | / | 244.82±414.45 | 22.37 | / |
| IL-17 ((pg/ml) | 101.83±59,76 | 62.08±8.47 | / | 92.68±55.65 | 68.07 | / |
| TNF-a (pg/ml) | 44.92±24.96 | 64.91±0.83 | / | 48.80±23.29 | 65.49 | / |
| MMP9 (pg/ml) | 19556±15061.46 | 19049.00±4459.02 | / | 20085.40±13097.16 | 158．96 | / |
| FGF-2 (pg/ml) | 47.31±43.30 | 70.46±21.47 | / | 48.91±37.66 | 85.64 | / |
| PDGF-AB (pg/ml) | 2134.04±1338.44 | 2090.50±84.15 | / | 2113.43±1160.04 | 2150.00 | / |
| ESR (mm/H) | 13.25±12.84 | 50.00±67.88 | / | 11.00±12.21 | 98.00 | / |
| CRP (mg/dL) | 8.00±13.41 | 22.65±31.61 | / | 6.46±12.12 | 45.00 | / |
| PTX3 (ng/ml) | 2.86±1.47 | 3.90±4.21 | / | 2.33±1.50 | 6.87 | / |

**Supplementary Table S3. Molecular signatures associated with vascular lesions or imaging changes in refractory patients**

| **Baseline Biomarkers** | **Baseline vascular occlusion** | | | **Post-treatment vascular imaging improvement** | | |
| --- | --- | --- | --- | --- | --- | --- |
|  | **No (n=6)** | **Yes (n=5)** | **P value** | **No (n=6)** | **Yes (n=5)** | **P value** |
| CCL22 (pg/ml) | 326.15±291.50 | 87.53±73.95 | 0.10 | 324.24±289.24 | 89.81±92.01 | 0.11 |
| IL-17 ((pg/ml) | 65.02±16.11 | 67.20±29.24 | 0.88 | 61.29±20.58 | 71.68±24.08 | 0.46 |
| TNF-a (pg/ml) | 52.24±15.66 | 43.22±10.18 | 0.30 | 44.03±5.23 | 53.07±19.38 | 0.36 |
| MMP9 (pg/ml) | 23041.67±12934.48 | 23391.40±11607.40 | 0.96 | 16662.17±7313.11 | 31046.80±11662.28 | 0.051 |
| FGF-2 (pg/ml) | 54.88±43.57 | 40.48±34.73 | 0.60 | 58.53±49.20 | 39.71±27.56 | 0.48 |
| PDGF-AB (pg/ml) | 3182.33±2202.14 | 2150.50±336.91 | 0.39 | 3541.20±2153.12 | 1898.00±500.56 | 0.12 |
| ESR (mm/H) | 54.83±46.67 | 21.40±16.29 | 0.16 | 33.00±43.13 | 47.60±35.77 | 0.56 |
| CRP (mg/dL) | 61.00±82.70 | 21.52±29.30 | 0.34 | 21.88±40.00 | 68.46±83.62 | 0.26 |
| PTX3 (ng/ml) | 5.31±6.31 | 5.02±5.22 | 0.94 | 2.25±0.66 | 8.69±6.94 | 0.11 |
